# Supplementary material for: Refining the South Asian Origin of the Romani people
Source: PubMed Central journal article supplement (PMC5580230; doi:10.1186/s12863-017-0547-x), 2017-08-31
Supplement: 12863_2017_547_MOESM1_ESM.pdf [file 12863_2017_547_MOESM1_ESM.pdf]

North India

South India

K=3

K=4

K=5

K=6

K=7

K=8

Roma  
 CEU  
 Bihl  
 Bhumij  
 Birhor  
 Brahmin  
 Gond  
 Gujarati  
 Ho  
 Jain  
 Kashmiri Pandit  
 Kharia  
 Kshatriya  
 Lodi  
 Maghwal  
 Pashlun  
 Punjabi  
 Sahariya  
 Santhal  
 Sahnami  
 Sindhi  
 Shivastava  
 Tharu  
 Vajsh  
 Adil Dravidar  
 Chenchu  
 Gounder  
 Gr-Andamanese  
 Halhali  
 Irula  
 Kallar  
 Kambar  
 Khasi  
 Kurukhyan  
 Kurumba  
 Madiga  
 Malai Kuravar  
 Mali  
 Minicoy  
 Munda  
 Narttu  
 Onge  
 Puliyar  
 Veddha  
 Velama  
 Vyysa

CEU - Utah residents with Northern and Western European ancestry from the CEPH collection.
