# Supplementary material for: Refining the South Asian Origin of the Romani people
Source: BMC Genet. 2017 Aug 31;18:82. doi: 10.1186/s12863-017-0547-x (PMC5580230; doi:10.1186/s12863-017-0547-x)
Supplement: Supplementary file 4 — Residual fit from trees estimated by TreeMix. The residuals visualization of the ML trees shown on Fig. 4. (PDF 45 kb) [file 12863_2017_547_MOESM4_ESM.pdf]

Heatmap showing genetic differentiation ( $F_{ST}$ ) between 12 populations. The color scale ranges from -11.9 SE (red) to 11.9 SE (dark blue). The populations are Roma, CEU, TSI, GIH, CHB, CHD, JPT, MEX, ASW, MKK, LWK, and YRI. The diagonal is white, indicating zero differentiation. The highest positive values (dark blue) are between GIH and CEU, and between CHB and CHD. The lowest values (red) are between GIH and CHB.

Heatmap showing the correlation of genetic structure between 12 populations. The color scale ranges from -7.5 SE (red) to 7.5 SE (blue). The diagonal is white, indicating zero correlation. The heatmap shows strong positive correlations (blue) between Roma and CEU, and between Brahmin and Gujarati. Strong negative correlations (red) are seen between Roma and Brahmin, and between CEU and Brahmin. Other populations show varying degrees of correlation, with Onge and CHB showing the lowest correlations.
